# Supplementary material
Source: publisher figshare collection journal article supplement (https://frontiersin.figshare.com/ndownloader/files/17510282)
Supplement: Supplementary file 1 [file 17510282]

Supplementary Material

CARIBBEAN NEAR-SHORE CORAL REEF BENTHIC COMMUNITY RESPONSE TO CHANGES ON SEDIMENTATION DYNAMICS AND ENVIRONMENTAL CONDITIONS

Abimarie Otaño-Cruz, Alfredo A. Montañez-Acuña, Noelia M. García-Rodríguez, Dakeishla M. Díaz-Morales, Elvira Cuevas, Jorge Ortiz-Zayas, Edwin A. Hernández-Delgado*

*** Correspondence:** edwin.hernandezdelgado@gmail.com

# Supplementary Figures and Table


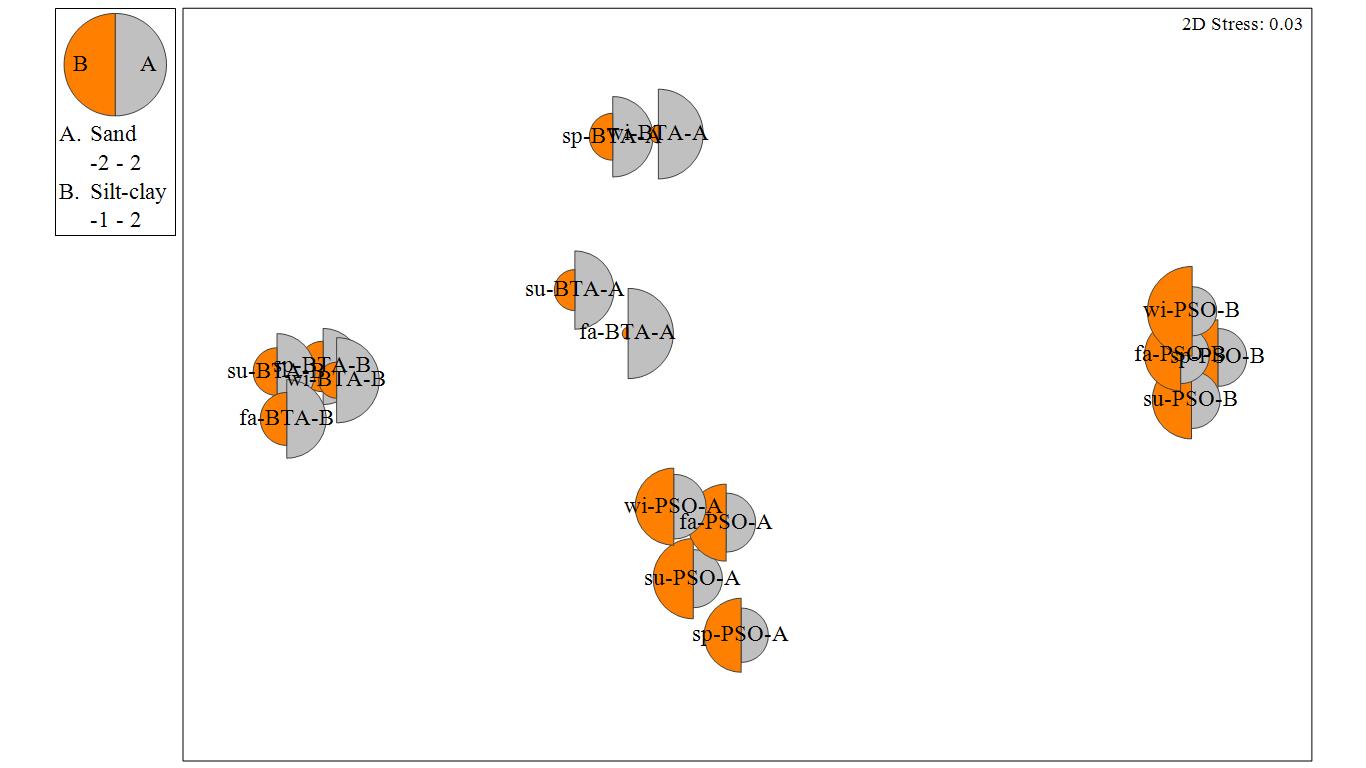


**Appendix 1.** Non-metric multidimensional scaling (nMDS) bubble plot of coral colony density structure at each site by distance based on Bray-Curtis similarity matrices, performed on square root-transformed data. Bubble plot represent sand (gray) and silt-clay (orange). Size represents sediment proportion of each variable at each season by site and distance, based on Euclidean similarity matrices performed on normalized data. Stress=0.03. Seasons are defined as: sp=spring, su=summer, fa=fall, and wi=winter.
